# Supplementary material
Source: MDPI journal article supplement (https://www.mdpi.com/2071-1050/13/12/6712)
Supplement: s1 [file s1 › sustainability-1215943-supplementary.pdf]

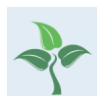**Table S1.** Physical and chemical characterization of the selected soils.

| Soil              | pH  | Cation Exchange Capacity<br>(cmol kg <sup>-1</sup> ) | Organic Carbon<br>Content (%) | Soil Constitution |             |             |
|-------------------|-----|------------------------------------------------------|-------------------------------|-------------------|-------------|-------------|
|                   |     |                                                      |                               | Loam<br>(%)       | Sand<br>(%) | Clay<br>(%) |
| Black soil        | 6.2 | 20.3                                                 | 2.68                          | 31.6              | 52.8        | 15.6        |
| Laterite soil     | 6.5 | 15.3                                                 | 0.82                          | 24.7              | 60.4        | 14.9        |
| Chestnut soil     | 7.1 | 13.2                                                 | 0.98                          | 17.7              | 59.6        | 22.7        |
| Yellow brown soil | 6.7 | 31.2                                                 | 1.63                          | 5.2               | 64.7        | 30.1        |

**Table S2.** Vertical distribution of procymidone in soil column.

| Soil              | Percentage of Pesticide Content in soil Columns<br>(%) |          |          | Leaching Solution (µg) |
|-------------------|--------------------------------------------------------|----------|----------|------------------------|
|                   | 0–10 cm                                                | 10–20 cm | 20–30 cm |                        |
| Laterite soil     | 65.8                                                   | 22.4     | 11.8     | ND <sup>a</sup>        |
| Yellow brown soil | 80.9                                                   | 15.9     | 3.2      | ND                     |
| Black soil        | 82.5                                                   | 13.6     | 3.9      | ND                     |
| Chestnut soil     | 92.2                                                   | 7.8      | ND       | ND                     |

<sup>a</sup>ND represents no detection.

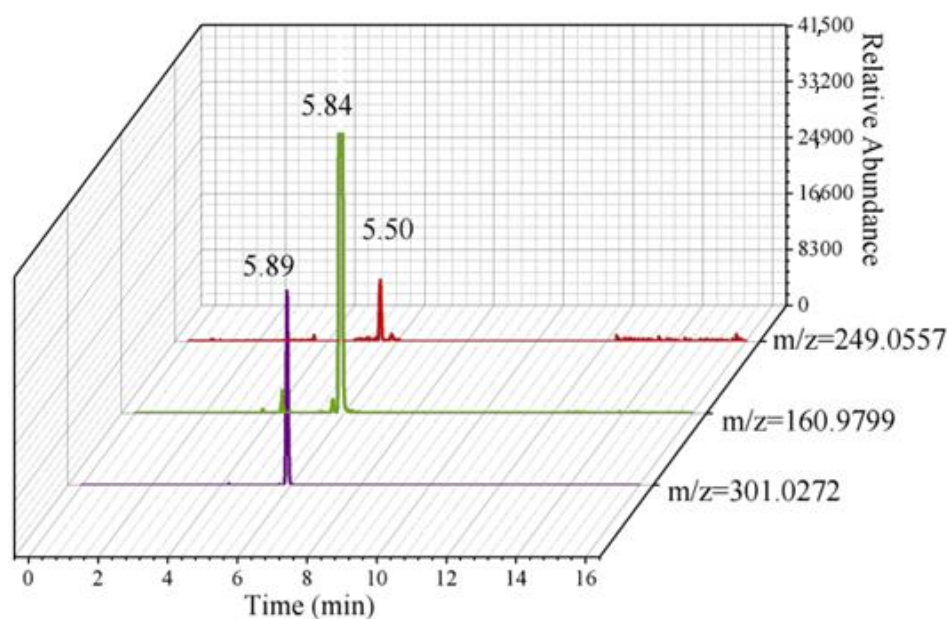**Figure S1.** The extracted ion chromatograms of three products of procymidone in soil.
